# Supplementary material for: Knowledge of Human Mpox (Monkeypox) and Attitude towards Mpox Vaccination among Male Sex Workers in China: A Cross-Sectional Study
Source: MDPI journal article supplement (doi:10.3390/vaccines11020285), 2023-01-28
Supplement: s1 [file s1]

Table S1. Knowledge of mpox and mpox vaccination among male sex workers in China

| No. | Knowledge of mpox                                                                                   | Answers                  |
|-----|-----------------------------------------------------------------------------------------------------|--------------------------|
| 1   | Mpox spreads via person-to-person close contact                                                     | <b>Agree</b><br>Disagree |
| 2   | Reinfection of mpox can happen                                                                      | <b>Agree</b><br>Disagree |
| 3   | Most mpox cases recover within weeks                                                                | <b>Agree</b><br>Disagree |
| 4   | Most mpox cases are HIV-positive                                                                    | <b>Agree</b><br>Disagree |
| 5   | HIV-infected and HIV-uninfected mpox cases have similar clinical signs                              | <b>Agree</b><br>Disagree |
| 6   | HIV ART* may prevent mpox                                                                           | <b>Agree</b><br>Disagree |
| 7   | Mpox infection has sequelae                                                                         | <b>Agree</b><br>Disagree |
| 8   | MPXV is detectable in semen                                                                         | <b>Agree</b><br>Disagree |
| 9   | MPXV is unlikely to have genetic mutations                                                          | <b>Agree</b><br>Disagree |
| 10  | Smallpox vaccine exists cross-protection against mpox                                               | <b>Agree</b><br>Disagree |
| 11  | Smallpox vaccine has intensive protection against mpox                                              | <b>Agree</b><br>Disagree |
| 12  | Mpox vaccination has side effects                                                                   | <b>Agree</b><br>Disagree |
| 13  | Mpox vaccine is not suitable for pregnant women, people who have heart problems and skin conditions | <b>Agree</b><br>Disagree |
| 14  | Replicating mpox live attenuated vaccine is not suitable for HIV-infected individuals               | <b>Agree</b><br>Disagree |
| 15  | High-risk groups should be prioritized when mpox supplies are low                                   | <b>Agree</b><br>Disagree |

Notes: \*ART means antiretroviral therapy. “Agree” as correct answer.

Table S2. Mpox-related questions and answers among male sex workers, in China.

| No. | Questions                                    | Answers                  |
|-----|----------------------------------------------|--------------------------|
| 1   | Ever heard of mpox:                          | No<br>Yes                |
| 2   | Paid attention to mpox outbreak information: | Always<br>Never<br>Often |
| 3   | Got mpox information from internet:          | No                       |

|   |                                                                 |        |
|---|-----------------------------------------------------------------|--------|
|   |                                                                 | Yes    |
| 4 | Got mpox information from traditional media:                    | No     |
|   |                                                                 | Yes    |
| 5 | China will become mpox endemic country:                         | No     |
|   |                                                                 | Yes    |
| 6 | Ever heard of the smallpox vaccine:                             | No     |
|   |                                                                 | Yes    |
|   |                                                                 | No     |
| 7 | Ever been vaccinated against smallpox:                          | Unsure |
|   |                                                                 | Yes    |
| 8 | Suitable for HIV-infected to get non-replicating smallpox live: | No     |
|   |                                                                 | Yes    |

---
